# Supplementary material for: Efficient visible and near-infrared photoluminescent attapulgite-based lanthanide one-dimensional nanomaterials assembled by ion-pairing interactions
Source: Royal Society of Chemistry journal article supplement (doi:10.1039/c4dt00188e), 2014-01-01
Supplement: c4dt00188e1.pdf [file c4dt00188e1.pdf]

Cite this: DOI: 10.1039/c0xx00000x

PAPER

www.rsc.org/xxxxxx

## Supporting Information

## Efficient visible and near-infrared photoluminescent attapulгите-based lanthanide one-dimensional nanomaterials assembled by ion-pairing interactions

5

Jun Xu,<sup>a,b</sup> Hao Chen,<sup>a</sup> Weisheng Liu<sup>a</sup> and Yu Tang\*<sup>a</sup>

Table S1. The composition analysis of the materials 2, 3 and 4a-e.

| Materials | C (%) | H (%) | N (%) | Ln(%) |
|-----------|-------|-------|-------|-------|
| 2         | 6.04  | 2.12  | 0     | 0     |
| 3         | 6.39  | 2.04  | 3.01  | 0     |
| 4a        | 6.95  | 2.01  | 2.07  | 1.85  |
| 4b        | 6.94  | 1.99  | 2.10  | 1.82  |
| 4c        | 7.02  | 2.04  | 2.11  | 1.87  |
| 4d        | 6.99  | 2.06  | 2.17  | 1.89  |
| 4e        | 6.90  | 2.09  | 2.15  | 1.85  |

Table S2 The luminescence decay times and the average lifetimes of hybrid materials 4a, 4b, 4c, 4d, and 4e<sup>a</sup>

| Samples | Transitions                                       | $\tau_1$ ( $\mu\text{s}$ ) | $\tau_2$ ( $\mu\text{s}$ ) | $\langle\tau\rangle$ ( $\mu\text{s}$ ) |
|---------|---------------------------------------------------|----------------------------|----------------------------|----------------------------------------|
| 4a      | $^5\text{D}_0 \rightarrow ^7\text{F}_2$           | 240.31(22.43%)             | 635.52(77.57%)             | 596.57                                 |
| 4b      | $^4\text{G}_{5/2} \rightarrow ^6\text{H}_{9/2}$   | 36.16(43.10%)              | 95.61(56.90%)              | 82.37                                  |
| 4c      | $^4\text{F}_{3/2} \rightarrow ^4\text{I}_{9/2}$   | 0.42(81.62%)               | 1.81(18.37%)               | 1.10                                   |
| 4d      | $^4\text{I}_{13/2} \rightarrow ^4\text{I}_{15/2}$ | 1.52(70.93%)               | 2.71(29.07%)               | 2.02                                   |
| 4e      | $^2\text{F}_{5/2} \rightarrow ^2\text{F}_{7/2}$   | 6.41(9.43%)                | 12.46(90.57%)              | 12.15                                  |

<sup>a</sup> Lifetimes ( $\tau$ ) and average lifetimes  $\langle\tau\rangle$ .

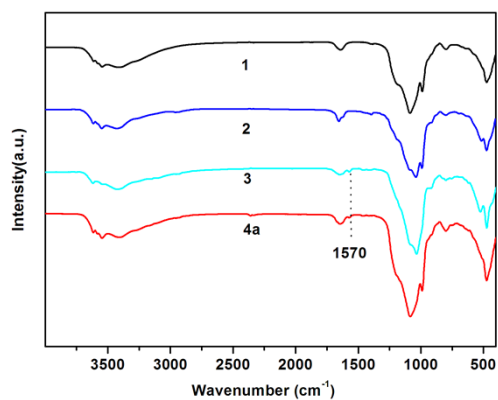

**Fig. S1** Fourier transform infrared spectra of materials **1**, **2**, **3**, and **4a**.

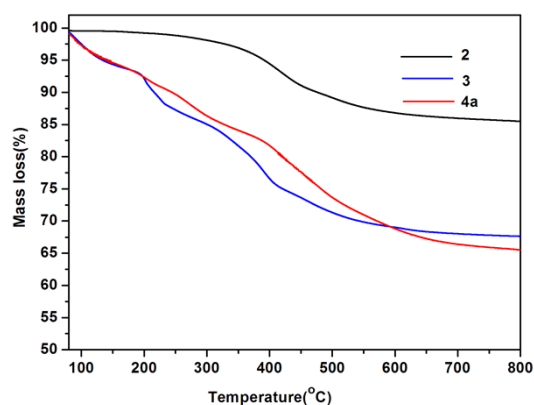

**Fig. S2** Thermogravimetry (TG) curves of the obtained hybrid materials **2**, **3** and **4a**.

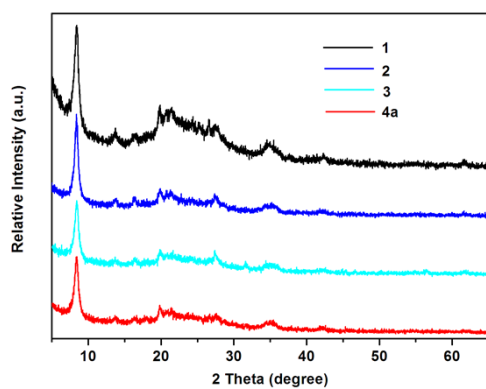

**5** **Fig. S3** Powder X-ray diffraction patterns for the obtained materials **1**, **2**, **3**, and **4a**.
